# Supplementary material for: Nanoscale solvent organization in metal–organic framework ZIF-8 probed by EPR of flexible β-phosphorylated nitroxides
Source: Royal Society of Chemistry journal article supplement (doi:10.1039/d3sc05724k), 2024-01-01
Supplement: d3sc05724k1.pdf [file d3sc05724k1.pdf]

## ELECTRONIC SUPPLEMENTARY INFORMATION

### **Nanoscale solvent organization in metal-organic framework ZIF-8 probed by EPR of flexible $\beta$ -phosphorylated nitroxides**

Artem S. Poryvaev,<sup>a</sup> Aleksandr A. Efremov,<sup>a,b</sup> Dmitry V. Alimov,<sup>a,b</sup> Kristina A. Smirnova,<sup>a,b</sup>  
Daniil M. Polyukhov,<sup>a</sup> Renad Z. Sagdeev,<sup>a</sup> Samuel Jacoutot,<sup>c</sup> Sylvain R. A. Marque,<sup>c,\*</sup> Matvey V.  
Fedin<sup>a,b,\*</sup>

<sup>a</sup>International Tomography Center SB RAS, Novosibirsk, 630090, Russia; [mfedin@tomo.nsc.ru](mailto:mfedin@tomo.nsc.ru)

<sup>b</sup>Novosibirsk State University, Novosibirsk, 630090, Russia

<sup>c</sup>Aix Marseille University, CNRS, UMR Avenue Escadrille Normandie-Niemen 7273 Marseille, 13397 cedex 20, France; [sylvain.marque@univ-amu.fr](mailto:sylvain.marque@univ-amu.fr)

#### **Table of contents:**

|     |                                                    |     |
|-----|----------------------------------------------------|-----|
| I   | PXRD data.....                                     | S2  |
| II  | DFT studies.....                                   | S3  |
| III | Pulse EPR (ESEEM) studies.....                     | S7  |
| IV  | Details of multi-parameter simulations.....        | S9  |
| V   | Additional EPR data and simulation parameters..... | S12 |

## I. PXRD data

The studied sample S1@ZIF-8 was characterized by powder X-ray diffraction (PXRD). The PXRD pattern (Fig. S1, black) showed typical  $2\theta$  peak positions for ZIF-8. Peak positions correspond well to the simulated PXRD data for ZIF-8 obtained using Mercury 3.3 (Fig. S1, blue).

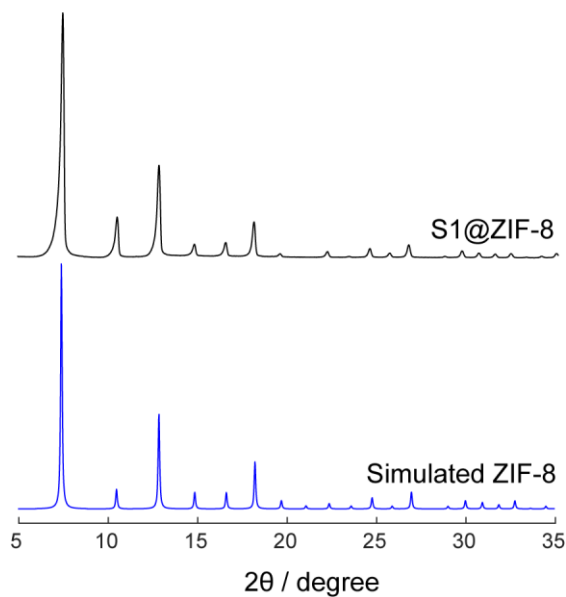

**Figure S1.** PXRD data for S1@ZIF-8 (black) and ZIF-8 simulated by Mercury 3.3 (blue).

Impregnation of S1@ZIF-8 with various solvents did not lead to any modification or destruction of the MOF structure. Figure S2 evidences this using MeOH as an example.

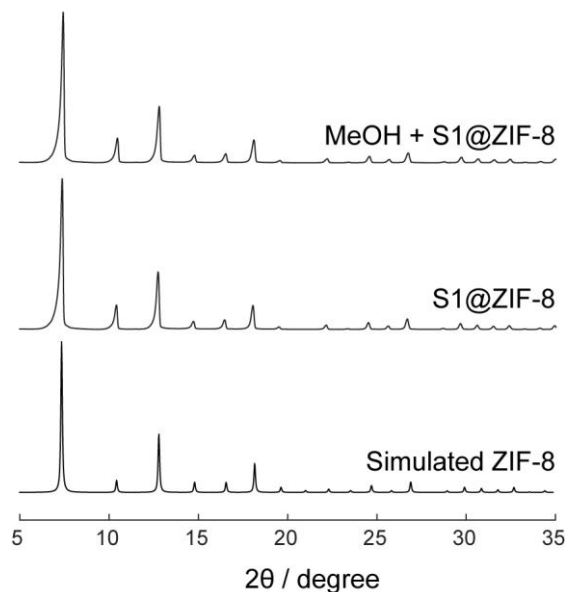

**Figure S2.** PXRD data for S1@ZIF-8, S1@ZIF-8 after methanol treatment and pattern simulated by Mercury 3.3.

## II. DFT studies

### II.1. Dependence of $A_P$ on $\theta$

We investigated the dependence of isotropic HFI constants  $A_N$  and  $A_P$  on the geometry of the radical.

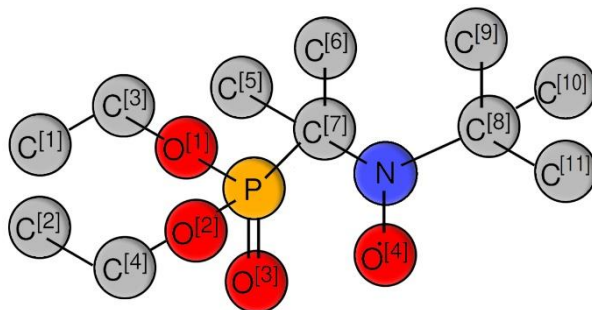

**Figure S3.** Atomic scheme of studied  $\beta$ -phosphorylated nitroxide radical. Hydrogens are not shown.

We found the equilibrium geometry of the radical using B3LYP/TZVP with RIJCOSX approximation, def2/J auxiliary basis set. To establish qualitative dependences, it can be assumed that SOMO of nitrogen is perpendicular to the N-O bond, therefore the angle  $\theta$  can be estimated according to equation (S1).

$$\theta \approx \widehat{O^{[4]}N, C^{[7]}P} + \frac{\pi}{2} = \theta_{approx} \quad (S1)$$

Therefore, we first scanned radical geometry changing  $\theta \approx \theta_{approx}$ . For each optimized geometry,  $A_P$  hyperfine interaction constants were calculated using TPSS / def2-TZVPD. The experimental points (taken from Table 1 and from Tables S3-S4) qualitatively coincide with the DFT calculation. (Fig. S4a).

### II.2. Influence of various geometric parameters on $A_P$ and its dependence on $\theta$

We selected geometric parameters (bond lengths, angles, dihedrals) which have the greatest impact on the values  $A_N$  and  $A_P$  (Table S2) and monitored how additional geometric constraints affect the dependence of  $A_P$  on  $\theta$ . In each case we varied the values of the selected geometric parameters around their equilibriums in reasonable ranges and calculated the dependence of  $A_P$  on angle  $\theta$  (more precisely, on  $\cos^2\theta$ ).

Figure S4 shows the dependence of  $A_P$  on  $\cos^2\theta$  for equilibrium parameters, which is in reasonably good agreement with experimental data.

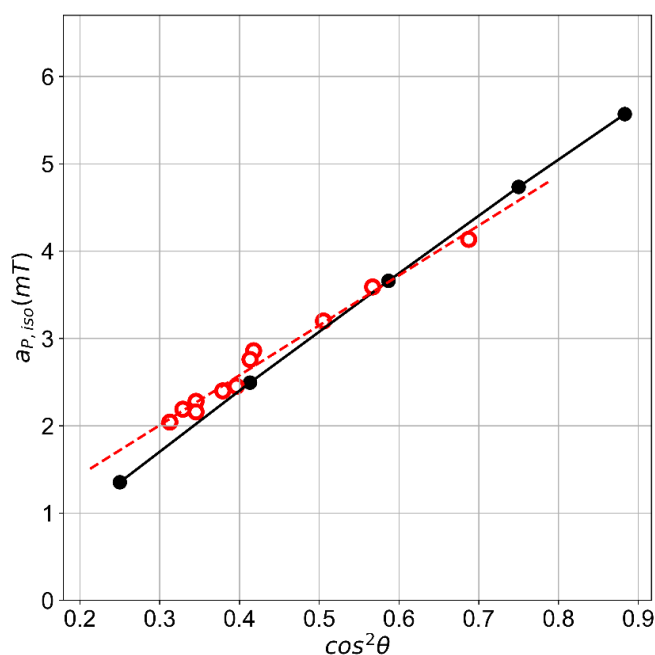

**Figure S4.** Dependence of  $A_P$  on  $\cos^2\theta$  for equilibrium parameters. Experimental points are shown by red circles. Dashed line represents a linear trend of experimental points.

Dihedral angles were varied in 15-degree increment from -30 to +30 relative to equilibrium value. Bond lengths were scanned over a range of 5% of the equilibrium length in 2.5% increment (variations in normal conditions depending on solvent polarity are expected to be smaller). Angles were scanned over a range of 15% around the equilibrium value in 7.5% increment. Table S1 and Fig.S3 explain which angles, bond lengths and dihedrals were varied.

**Table S1.** Geometric parameters varied around their equilibrium values. Corresponding color codes used in Fig.S5 are indicated.

| Bonds           |                  | Angles                                          |                  | Dihedrals                                       |                  |
|-----------------|------------------|-------------------------------------------------|------------------|-------------------------------------------------|------------------|
| atoms           | Color (Fig. S5a) | atoms                                           | Color (Fig. S5b) | atoms                                           | Color (Fig. S5c) |
| NO <sup>4</sup> | Red              | O <sup>4</sup> NC <sup>8</sup>                  | Red              | NC <sup>7</sup> PO <sup>3</sup>                 | Red              |
| NC <sup>7</sup> | Green            | C <sup>8</sup> NC <sup>7</sup> P                | Green            | C <sup>8</sup> NC <sup>7</sup> P                | Green            |
| PO <sup>3</sup> | Blue             | O <sup>4</sup> NC <sup>7</sup> C <sup>5/6</sup> | Blue             | O <sup>4</sup> NC <sup>7</sup> C <sup>5/6</sup> | Blue             |
| PC <sup>7</sup> | Magenta          | C <sup>7</sup> PO <sup>3</sup>                  | Magenta          | O <sup>4</sup> NC <sup>7</sup> P                | Black            |
|                 |                  | C <sup>7</sup> PO <sup>1/2</sup>                | Yellow           |                                                 |                  |

Upon variation of geometric parameters indicated in Table S1, some of the resulting conformations had too high energy (1.25 eV above equilibrium), i.e. were highly improbable. Such conformations are shown with “x” signs in Figure S5 and corresponding dashed lines. The obtained dependencies of  $A_P$  vs.  $\cos^2\theta$  all show closely linear correlations and reasonably small deviation from the equilibrium curve, with exceptions for the above-mentioned highly improbable conformations.

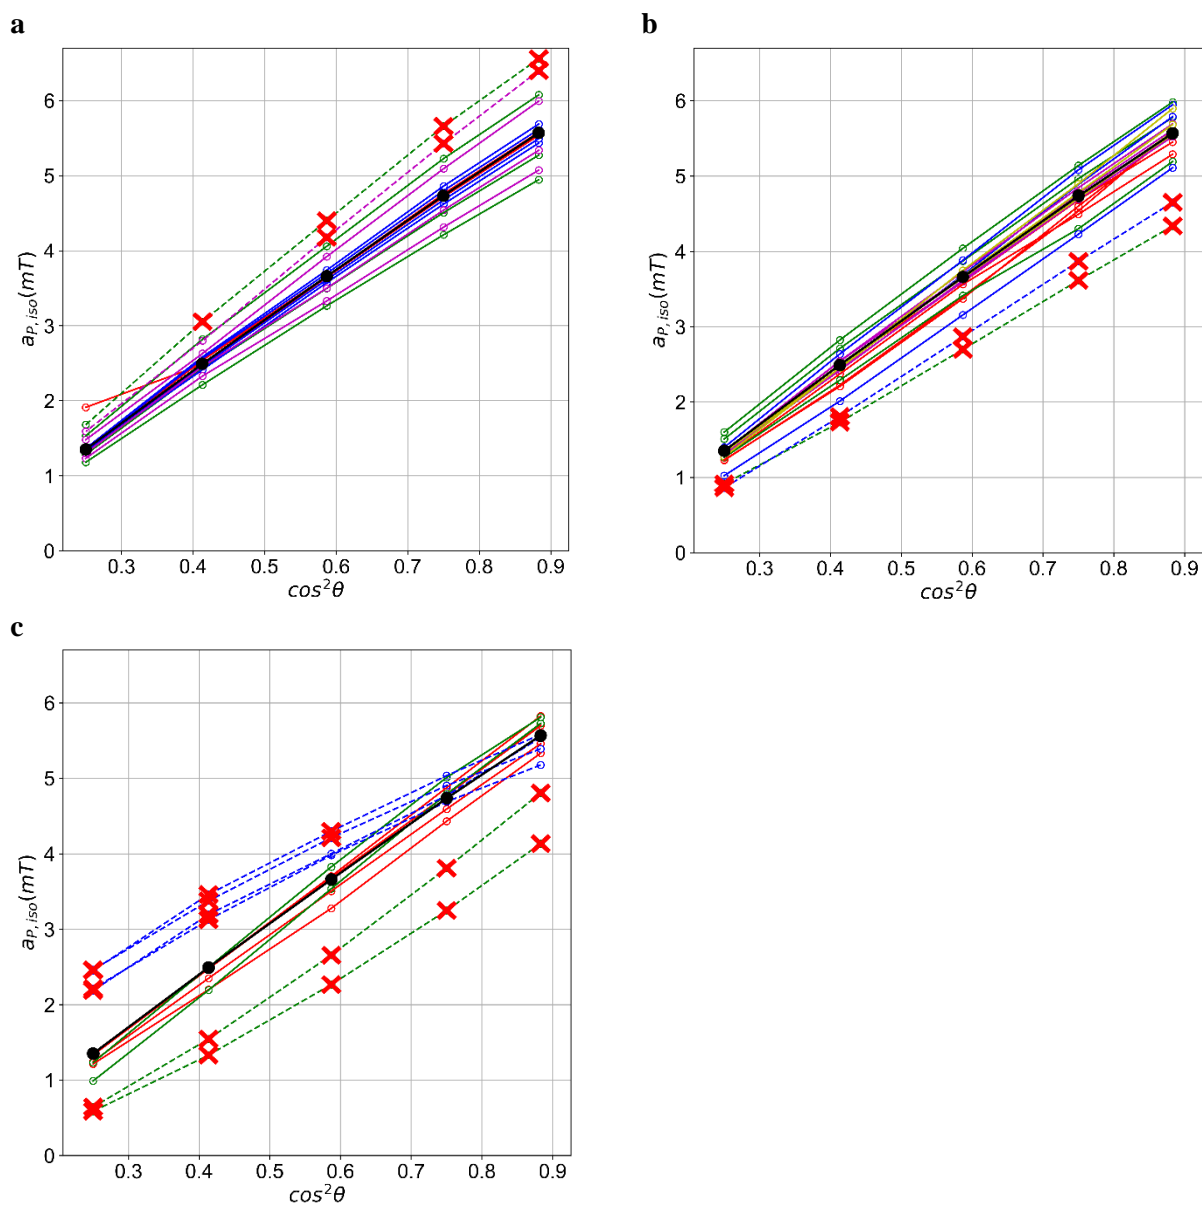

**Figure S5.** Dependence of  $A_P$  on  $\cos^2\theta$  upon variation of the geometric parameters of the radical: (a) bond lengths, (b), angles (c) dihedrals. Points corresponding to low-probability radical conformations are marked with “x” signs and connected by dashed lines.

An important conclusion following the results of Fig.S5 is that in all cases the correlation of  $A_P$  with  $\cos^2\theta$  is maintained, and (excluding the most improbable conformations) the absolute deviations of  $A_P$  upon variations of geometry are relatively small (on the order of 30%). At the same time, the theoretical (extrapolated) changes of  $A_P$  vs.  $\cos^2\theta$  reach factor of 4 within  $\cos^2\theta = [0.25 \text{ } 0.88]$ , and experimental data confirms changes by a factor of  $\sim 2$  within  $\cos^2\theta = [0.3 \text{ } 0.7]$  (Fig. S4). Thus, we safely assume that all other geometrical changes have minor influence on the  $A_P$  value, whereas the dominant role of  $\theta$  is undoubted.

In addition, we have examined the range of typical geometrical differences that S1 undergoes in solvents of different polarity. For this sake, the geometry of S1 was optimized in

methanol ( $E_N^T = 0.762$ ) and toluene ( $E_N^T = 0.099$ ); then, angles and bond lengths (the same as given in Table S1) were compared. Dihedrals were not considered as they automatically change together with  $\theta$  vs. polarity. In this calculation we again used B3LYP with RIJCOSX approximation, the def2/J auxiliary basis set; CPCM method was applied to set the polarities of methanol and toluene. Table S2 summarizes the obtained data.

**Table S2.** Selected angles and bond lengths for S1 optimized in methanol and in toluene. Relative differences from equilibrium state without solvent are given in each case.

| <b>Bonds</b>                         | <b>Without solvent / Å</b> | <b>In methanol / Å</b> | <b>Difference / %</b> | <b>In toluene / Å</b> | <b>Difference / %</b> |
|--------------------------------------|----------------------------|------------------------|-----------------------|-----------------------|-----------------------|
| <b>NO<sup>4</sup></b>                | 1.281                      | 1.284                  | 0.195                 | 1.283                 | 0.097                 |
| <b>NC<sup>7</sup></b>                | 1.502                      | 1.510                  | 0.551                 | 1.514                 | 0.775                 |
| <b>PO<sup>3</sup></b>                | 1.497                      | 1.504                  | 0.472                 | 1.501                 | 0.269                 |
| <b>PC<sup>7</sup></b>                | 1.892                      | 1.890                  | 0.084                 | 1.886                 | 0.276                 |
|                                      |                            |                        |                       |                       |                       |
| <b>Angles</b>                        | <b>Without solvent / °</b> | <b>In methanol / °</b> | <b>Difference / %</b> | <b>In toluene / °</b> | <b>Difference / %</b> |
| <b>O<sup>4</sup>NC<sup>8</sup></b>   | 113.417                    | 113.258                | 0.159                 | 115.064               | 1.647                 |
| <b>O<sup>4</sup>NC<sup>7</sup></b>   | 115.328                    | 115.879                | 0.551                 | 114.198               | 1.130                 |
| <b>NC<sup>7</sup>P</b>               | 107.009                    | 108.406                | 1.397                 | 112.929               | 5.920                 |
| <b>C<sup>7</sup>PO<sup>3</sup></b>   | 114.965                    | 117.328                | 2.363                 | 116.860               | 1.895                 |
| <b>C<sup>7</sup>PO<sup>1/2</sup></b> | 100.667                    | 100.112                | 0.555                 | 98.696                | 1.971                 |

As follows from Table S2, it was obtained that maximum changes in angles (other than  $\theta$ ) do not exceed 6%, and maximum changes in bond lengths do not exceed 1%. At the same time, such variations lead to the  $\theta$  changes within 5%. Therefore, we believe that the realistic geometrical changes (other than  $\theta$  angle) in S1 radical lead to completely negligible (within 5%) changes in  $\theta$  angle. Our consideration (Fig. S5) of such huge deviations as 30 degrees for angles and 5% for bond lengths is a very strong exaggeration provided to show that even with such unrealistically huge geometry changes  $A_P$  value changes only moderately. Under more realistic assumptions (<6% changes in angles and <1% for the bond lengths) the changes of  $A_P$  lie within 5%. Thus, except for the  $\theta$  angle, the changes of other angles and bond lengths in S1 vs. polarity have minor influence on the discussed phenomena.

### III. Pulse EPR (ESEEM) studies

An additional way to verify whether indeed alcohol molecules in the cavity of ZIF-8 become oriented with OH groups toward center of the cavity (where radical resides, as is sketched in Figure 5 of the main text) is to perform pulse EPR (Electron Spin Echo Envelop Modulation, ESEEM) measurements with partly deuterated alcohols. This idea follows earlier work of Kevan et.al. [J. Phys. Chem. 1989, 93, 317-322] and relies on the measurement of the electron(radical) – deuteron(solvent) hyperfine interactions via characteristic deuterium ESEEM peak. Indeed, if we use partly deuterated methanol (as an example), CH<sub>3</sub>OD, then we can hope to observe differences in deuterium ESEEM in two situations: (i) CH<sub>3</sub>OD molecules are randomly oriented around the radical, as is presumably in the bulk solvent, or (ii) CH<sub>3</sub>OD molecules are preferentially directed with OD-groups toward radical, as is supposed in ZIF-8 (Figure 5). One might expect that in the second case (ii) average OD-ON distances will be shorter and the deuterium peak will become broader.

In order to perform this experiment, we first synthesized partly deuterated methanol CH<sub>3</sub>OD using the following procedure. Protonated methanol was mixed and stirred with D<sub>2</sub>O to induce proton-deuteron exchange in OH group, then distilled and analyzed by NMR. NMR measurements were performed on Bruker AVANCE III HD spectrometer operating at 300 MHz (<sup>1</sup>H Larmor frequency). To determine -CH<sub>3</sub>:-OH protons ratio, 500 μL of the solvent (CH<sub>3</sub>OH and CH<sub>3</sub>OD) was transferred to an NMR tube. The ratio was determined based on the integrals of -CH<sub>3</sub> and -OH (Figure S6), eventually showing the huge excess of CH<sub>3</sub>OD.

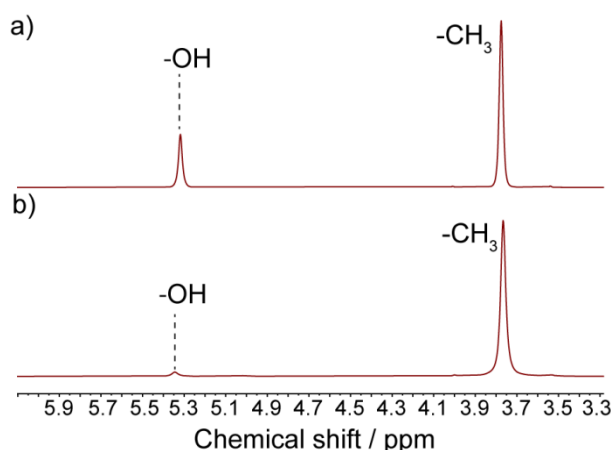

**Figure S6.** NMR spectra of CH<sub>3</sub>OH (reference, a) and CH<sub>3</sub>OD (synthesized, b).

Next, we performed three-pulse ESEEM measurements (80 K) in identical conditions for S1 radical dissolved in bulk CH<sub>3</sub>OD and for S1@ZIF-8 impregnated with CH<sub>3</sub>OD. The time delay between first two pulses was adjusted to the maximum of deuterium modulation at X-band (around

220 ns), all time delays and processing of ESEEM time-traces were kept exactly the same for two samples. Figure S7 shows the obtained frequency-domain data.

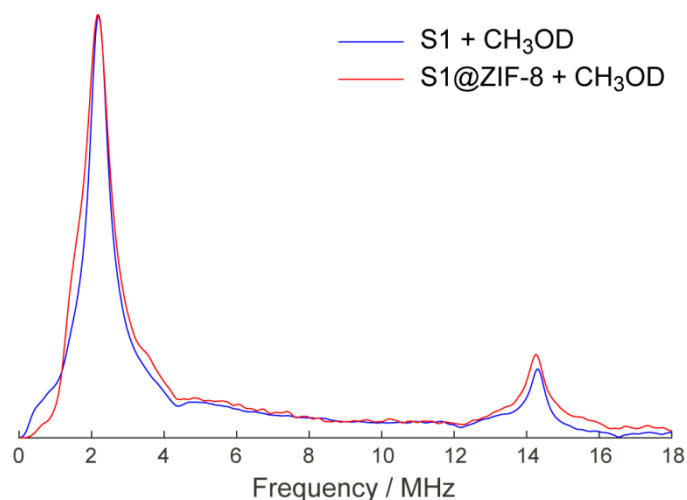

**Figure S7.** Frequency-domain 3pESEEM spectra of S1 radical dissolved in bulk CH<sub>3</sub>OD (blue) and S1@ZIF-8 impregnated with CH<sub>3</sub>OD (red).

The observed spectra are essentially the same. In fact, very small broadening can be seen for S1@ZIF-8 impregnated with CH<sub>3</sub>OD, which is the anticipated trend. Certainly, such small difference cannot be considered as an ultimate proof-of-the-concept; however, at least it somewhat supports our interpretation on solvent nanoordering and certainly does not contradict it. In general, there can be many factors influencing the deuterium ESEEM peak in-MOF vs. in-bulk. For instance, even assuming that OD groups of CH<sub>3</sub>OD all point toward the cavity center and the radical, the distances OD-ON can be slightly larger in MOF than in the bulk. Therefore, such comparison does not in principle guarantee solid conclusions on mutual location of radical and methanol in the MOF cavity.



#### IV. Details of multi-parameter simulations

In general form, equation (3) of the main text has to be written as:

$$\theta = \theta_0 + a_1 E_T^N + a_2 c + a_3 V_X + a_4 V_M \quad (\text{S2})$$

Therefore, we have checked all main correlations following the scheme given by Table S3 below.

**Table S3.** Variation of parameters in eq.(S2) and the corresponding statistics.

| eq.          | y-intercept <sup>a,b</sup> | a <sub>1</sub> <sup>b,c</sup> | t-test <sup>c</sup> | a <sub>2</sub> <sup>b,d</sup> | t-test <sup>c</sup> | a <sub>3</sub> <sup>b,e</sup> | t-test <sup>c</sup> | a <sub>4</sub> <sup>b,f</sup> | t-test <sup>c</sup> | R <sup>2g</sup> | F <sup>h</sup> | N <sup>i</sup> |
|--------------|----------------------------|-------------------------------|---------------------|-------------------------------|---------------------|-------------------------------|---------------------|-------------------------------|---------------------|-----------------|----------------|----------------|
| (i)          | 39.2 (14)                  | 28.4<br>(25)                  | 99.99               | <sub>j</sub>                  | <sub>k</sub>        | <sub>j</sub>                  | <sub>k</sub>        | <sub>j</sub>                  | <sub>k</sub>        | 0.932           | <sub>k</sub>   | 11             |
| (ii)         | 30.5 (16)                  | <sub>j</sub>                  | <sub>k</sub>        | 0.039<br>(3)                  | 99.99               | <sub>j</sub>                  | <sub>k</sub>        | <sub>j</sub>                  | <sub>k</sub>        | 0.966           | <sub>k</sub>   | 9              |
| (iii)        | 78.5 (36)                  | <sub>j</sub>                  | <sub>k</sub>        | <sub>j</sub>                  | <sub>k</sub>        | -0.45<br>(6)                  | 99.99               | <sub>j</sub>                  | <sub>k</sub>        | 0.856           | <sub>k</sub>   | 11             |
| (iv)         | 76.6 (37)                  | <sub>j</sub>                  | <sub>k</sub>        | <sub>j</sub>                  | <sub>k</sub>        | <sub>j</sub>                  | <sub>k</sub>        | -0.31(5)                      | 99.99               | 0.835           | <sub>k</sub>   | 11             |
| (v)          | 36.8 (17)                  | 21.4<br>(40)                  | 99.93               | 0.010<br>(5)                  | 92.73               | <sub>j</sub>                  | <sub>k</sub>        | <sub>j</sub>                  | <sub>k</sub>        | 0.956           | 87             | 11             |
| (vi)         | 53.7 (51)                  | 19.1<br>(37)                  | 99.92               | <sub>j</sub>                  | <sub>k</sub>        | -0.18<br>(6)                  | 98.0                | <sub>j</sub>                  | <sub>k</sub>        | 0.967           | 117            | 11             |
| <b>(vii)</b> | <b>53.1 (37)</b>           | <b>19.4<br/>(28)</b>          | <b>99.98</b>        | <sub>j</sub>                  | <sub>k</sub>        | <sub>j</sub>                  | <sub>k</sub>        | <b>-0.13<br/>(3)</b>          | <b>99.52</b>        | <b>0.976</b>    | <b>165</b>     | <b>11</b>      |
| (viii)       | 50.6 (54)                  | 19.5<br>(32)                  | 99.93               | 0.003<br>(5)                  | 47.00               | <sub>j</sub>                  | <sub>k</sub>        | -0.11<br>(4)                  | 96.60               | 0.997           | 102            | 11             |

<sup>a</sup> Student *t*-test reliable at 99.99%. <sup>b</sup> Error given on the last digit. <sup>c</sup> Coefficient *a*<sub>1</sub> for E<sub>T</sub><sup>N</sup> parameter. <sup>d</sup> Coefficient *a*<sub>2</sub> for *c* parameter. <sup>e</sup> Coefficient *a*<sub>3</sub> for V<sub>X</sub> parameter. <sup>f</sup> Coefficient *a*<sub>4</sub> for V<sub>M</sub> parameter. <sup>g</sup> Linear regression coefficient R<sup>2</sup>. <sup>h</sup> F-test value at 99.99% reliability. <sup>i</sup> Number of data. <sup>j</sup> Not included. <sup>k</sup> Not estimated.

Linear and multi-parameter regressions have been performed using OriginPro 2023.

Note that E<sub>T</sub><sup>N</sup> aliases polarity effect given by π\* and hydrogen bonding effect, meaning that these parameters need not to be tested in multi-parameters correlations. Cohesive pressure *c* is used to test stiffness and structuredness of the solvation cage. This parameter is partly linked to the volume of the molecule which is either estimated by the molecular volume V<sub>M</sub> or the intrinsic volume V<sub>X</sub>. In general, *c*, V<sub>X</sub> and V<sub>M</sub> are not tested in common correlation. The best multi-parameter correlation is selected by combining the highest R<sup>2</sup> and F-test values, the highest reliable values of coefficient (Student *t*-test) with the lowest errors. Consequently, eqs. (i)-(v) are discarded due to the too low R<sup>2</sup>, too low F-test and t-test values. Eq.(viii) is discarded because the reliability (*t*-test) on

the value of coefficient before  $c$  is lower than 50%. Eq.(viii) is preferred versus eq.(vi) only due to a slightly better statistics. Nonetheless,  $V_M$  and  $V_X$  report both on the effect of the size of the solvent.

Table S4 reports actual values used in our multi-parameter correlations.

**Table S4.** The values used in multi-parameter correlations.

| $\theta^a$ | $E_T^{Nb}$ | $c^b$ | $V_X^c$ | $V_M^d$ | solvent <sup>e</sup> | Number    |
|------------|------------|-------|---------|---------|----------------------|-----------|
| 38         | 0.009      | 205   | 81.3    | 114.52  | <i>n</i> -pentane    | <b>1</b>  |
| 43         | 0.009      | 205   | 81.3    | 114.52  |                      |           |
| 53         | 0.546      | 558   | 59      | 76.51   | <i>i</i> -PrOH       | <b>2</b>  |
| 55         | 0.617      | 600   | 59      | 74.8    | <i>n</i> -PrOH       | <b>3</b>  |
| 58         | 0.654      | 676   | 44.9    | 58.41   | EtOH                 | <b>4</b>  |
| 61         | 0.762      | 858   | 30.8    | 40.43   | MeOH                 | <b>5</b>  |
| 62         | 0.790      | 1050  | 50.8    | 56.01   | EG                   | <b>6</b>  |
| 62         | 0.898      | 573   | 41.5    | 72.4    | TFE                  | <b>7</b>  |
| 37         | 0.009      | 225   | 95.4    | 130.5   | <i>n</i> -hexane     | <b>8</b>  |
| 48         | 0.009      | 225   | 95.4    | 130.5   |                      |           |
| 54         | 0.386      | 581   | 58.1    | 77.4    | DMF                  | <b>9</b>  |
| 57         | 0.481      | 669   | 42.4    | 53.64   | MeNO <sub>2</sub>    | <b>10</b> |
| 46         | 0.207      | 359   | 62.2    | 81.14   | THF                  | <b>11</b> |

<sup>a</sup> Given by eq.2 in manuscript.

<sup>b</sup> Given in C. Reichardt, T. Welton, Solvent and Solvent Effect in Organic Chemistry, 4<sup>th</sup> ed., Wiley-VCH, Weinheim, 2011.

<sup>c</sup> Given in Y. Marcus, *The Properties of Solvents*, Vol. 4, Wiley, Chichester, 1998.

<sup>d</sup> Given in G. E. Zaikov, R. G. Makitra, G. G. Midyana, L. I. Bazylyak, *Influence of the Solvent on Some Radical Reaction Chemistry Research and Applications Series*, Nova Science Publishers Inc., New York, **2010**

<sup>e</sup> *i*-PrOH: isopropanol; *n*-PrOH: propan-1-ol; EG: ethylene glycol; TFE: 2,2,2-trifluoroethanol; DMF: dimethylformamide, MeNO<sub>2</sub>: nitromethane; THF: tetrahydrofurane.

Figures S8-S10 report the corresponding plots of the multi-parameter correlations.

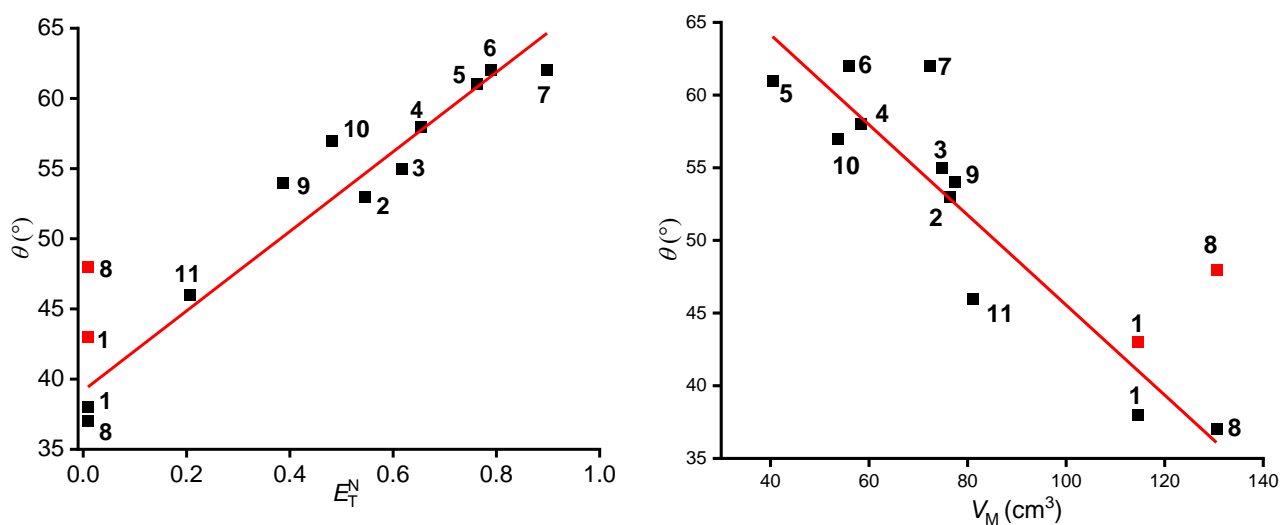

**Figure S8.** Plot  $E_T^N$  vs  $\theta$  for solvent **1** – **11**. In red second isomer observed in **1** and **8**.

**Figure S9.** Plot  $V_M$  vs  $\theta$  for solvent **1** – **11**. In red second isomer observed in **1** and **8**.

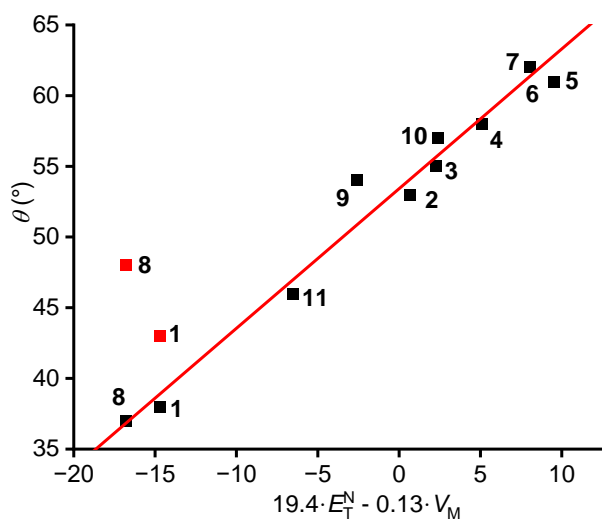

**Figure S10.** Plot  $f(E_T^N, V_M)$  vs  $\theta$  for solvent **1** – **11**. In red second isomer observed in **1** and **8**.

## V. Additional EPR data and simulation parameters

Figure S11 shows additional CW EPR data for S1@ZIF-8 impregnated with non-hydrogen bonding solvents.

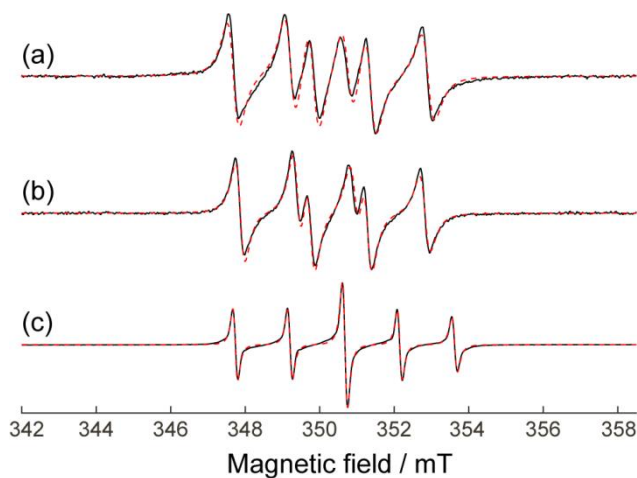

**Figure S11.** X-band room-temperature CW EPR spectra of S1@ZIF-8 impregnated by: N,N-dimethylformamide (a), nitromethane (b), tetrahydrofuran (c). Experimental spectra are shown in solid black lines, simulations in dotted red lines.

Table S5 reports all major parameters used in simulations of the CW EPR spectra shown in Figures 3, 7 and S11. Note that in Tables 1 and 2 we report isotropic  $^{14}\text{N}$  HFI constants, to comply with theoretical approaches developed for the analysis of  $\beta$ -phosphorylated nitroxides earlier. The rotational correlation time ( $\tau_c$ ) and  $^{14}\text{N}$  HFI anisotropy need to be taken into account only to better fit the intensities of the EPR lines, while the splittings at current small  $\tau_c$  values are not yet influenced by HFI anisotropy.  $^{14}\text{N}$  HFI tensor was typical for nitroxides (verified by low-temperature data on S1) and taken for each solvent to provide correspondence with the isotropic HFI value. It was not necessary to consider the  $^{31}\text{P}$  HFI anisotropy, as it is usually small for  $\beta$ -atoms.

**Table S5.** Simulation parameters, including HFI anisotropy and rotational correlation times. g-tensor was taken  $g=[2.0098\ 2.0068\ 2.0027]$  in all cases.

| solvent                    | $A_N$ / mT |          |          | $A_P$ / mT | $\tau_c$ / ns | weight |
|----------------------------|------------|----------|----------|------------|---------------|--------|
|                            | $A_{xx}$   | $A_{yy}$ | $A_{zz}$ |            |               |        |
| S1@ZIF + isopropanol       | 0.65       | 0.65     | 3.242    | 2.271      | 0.22          | -      |
| S1@ZIF + propanol          | 0.65       | 0.65     | 3.260    | 2.038      | 0.19          | -      |
| S1@ZIF + ethanol           | 0.65       | 0.65     | 3.305    | 1.840      | 0.28          | -      |
| S1@ZIF + methanol          | 0.65       | 0.65     | 3.329    | 1.543      | 0.16          | -      |
| S1@ZIF + ethylene glycole  | 0.65       | 0.65     | 3.395    | 1.470      | 0.19          | -      |
| S1@ZIF +TFE                | 0.65       | 0.65     | 3.380    | 1.430      | 0.21          | -      |
| S1@ZIF open to air         | 0.65       | 0.65     | 2.960    | 4.033      | 0.06          | -      |
|                            |            |          |          |            |               |        |
| S1@ZIF + dimethylformamide | 0.65       | 0.65     | 3.320    | 2.160      | 0.17          | -      |

|                            |                   |       |      |      |
|----------------------------|-------------------|-------|------|------|
| S1@ZIF + MeNO <sub>2</sub> | [0.65 0.65 3.320] | 1.890 | 0.19 | -    |
| S1@ZIF + tetrahydrofurane  | [0.65 0.65 3.125] | 2.955 | 0.10 | -    |
|                            |                   |       |      |      |
| S1@ZIF + hexane            | [0.65 0.65 2.993] | 3.798 | 0.18 | 0.45 |
|                            | [0.65 0.65 3.095] | 2.723 | 0.56 | 0.55 |
| S1@ZIF + pentane           | [0.65 0.65 2.993] | 3.798 | 0.14 | 0.45 |
|                            | [0.65 0.65 3.095] | 3.218 | 0.14 | 0.55 |
